# Supplementary material for: Pemafibrate suppresses NLRP3 inflammasome activation in the liver and heart in a novel mouse model of steatohepatitis-related cardiomyopathy
Source: PubMed Central journal article supplement (PMC8863801; doi:10.1038/s41598-022-06542-8), 2022-02-22
Supplement: 41598_2022_6542_MOESM1_ESM.pdf [file 41598_2022_6542_MOESM1_ESM.pdf]

## Supplementary Information

Pemafibrate suppresses NLRP3 inflammasome activation in the liver and heart in a novel mouse model of steatohepatitis-related cardiomyopathy

Kanno K. et al.

### Supplemental Table S1. Taqman<sup>®</sup> primers used for real-time quantitative PCR.

| Probe                                                                                             | Cat. Number   |
|---------------------------------------------------------------------------------------------------|---------------|
| Tumour necrosis factor a (Tnfa)                                                                   | Mm00443258_m1 |
| Interleukin 1 beta (Il1b)                                                                         | Mm00434228_m1 |
| Interleukin 6 (Il6)                                                                               | Mm00446190_m1 |
| Transforming growth factor beta (Tgfb)                                                            | Mm01178820_m1 |
| Collagen type I alpha 1 chain (Col1a1)                                                            | Mm00801666_m1 |
| Collagen type I alpha 2 chain (Col1a2)                                                            | Mm00483888_m1 |
| 3-Hydroxy-3-Methylglutaryl-CoA synthase 1 (Hmgcs1)                                                | Mm01304569_m1 |
| 3-hydroxy-3-methyl-glutaryl-CoA reductase (Hmgr)                                                  | Mm01282499_m1 |
| Acetyl-CoA carboxylase 1 (Acc1)                                                                   | Mm01304257_m1 |
| Fatty acid synthase (Fasn)                                                                        | Mm00662319_m1 |
| Stearoyl-CoA desaturase-1 (Scd1)                                                                  | Mm00772290_m1 |
| Uncoupling protein 3 (Ucp3)                                                                       | Mm01163394_m1 |
| Camitine palmitoyltransferase I a (Cpt1a)                                                         | Mm01231183_m1 |
| Acyl-CoA oxidase 1 (Acox)                                                                         | Mm01246835_m1 |
| Chemokine (C-C motif) ligand 5 (Ccl5)                                                             | Mm01302427_m1 |
| Chemokine (C-C motif) ligand 2 (Ccl2, MCP-1)                                                      | Mm00441242_m1 |
| Matrix metalloproteinase 9 (MMP9)                                                                 | Mm00442991_m1 |
| Nucleotide-binding oligomerization domain-like receptor family, pyrin domain-containing 3 (Nlrp3) | Mm00840904_m1 |
| Liver X receptors $\alpha$ (LXR $\alpha$ )                                                        | Mm00443451_m1 |
| ATP-binding cassette transporter A1 (Abca1)                                                       | Mm00442646_m1 |
| Sterol regulatory element-binding transcription factor 1 (Srebf1)                                 | Mm00550338_m1 |
| Sterol regulatory element-binding transcription factor 2 (Srebf2)                                 | Mm01306292_m1 |
| Fibroblast growth factor 21 (Fgf21)                                                               | Mm00840165_g1 |
| Uncoupling protein-2 (Ucp2)                                                                       | Mm00627599_m1 |
| Microsomal triglyceride transfer protein (Mttp)                                                   | Mm00435015_m1 |
| Caspase-1 (Casp1)                                                                                 | Mm00438023_m1 |
| Camitine palmitoyltransferase 1b (Cpt1b)                                                          | Mm00487200_m1 |
| RNA polymerase II subunit A (Polr2a)                                                              | Mm00839493_m1 |
| Beta-actin ( $\beta$ -actin)                                                                      | Mm00607939_s1 |

**Supplemental Table S2. Primary antibodies for western blotting.**

| Antigen                                              | Cat. Number |
|------------------------------------------------------|-------------|
| Caspase-1 (Casp1)                                    | 14-9832-82  |
| Asc                                                  | AL177       |
| Protein kinase B (Akt)                               | 2920S       |
| Phospho-protein kinase B (pAkt)                      | 4060S       |
| Mechanistic target of rapamycin (mTOR)               | 2972S       |
| Phospho-mechanistic target of rapamycin (pmTOR)      | 2971S       |
| Glyceraldehyde-3-phosphate dehydrogenase (Gapdh)     | 8884        |
| Liver X receptors $\alpha$ (LXR $\alpha$ )           | Ab176323    |
| ATP-binding cassette transporter A1 (Abca1)          | NB400-105   |
| Sterol regulatory element-binding protein 1 (Srebf1) | Sc-366      |
| Sterol regulatory element-binding protein 2 (Srebf2) | Ab30682     |
| Microsomal triglyceride transfer protein (Mtp)       | Ab75316     |
| CD36                                                 | Ab133625    |
| LC3                                                  | 2775S       |
| Rubicon                                              | 8465S       |
| p62                                                  | 23214S      |
| Beclin-1                                             | 3738S       |
| $\beta$ -actin                                       | A3854       |

**Supplemental Table S3. Fluorescent conjugated antibodies for flow cytometry analysis.**

| Antibody                   | Clone                |
|----------------------------|----------------------|
| FITC anti-Ly6G             | 1A8 (BioLegend)      |
| PerCP/Cyanine5.5 anti-CD45 | 30-F11 (BioLegend)   |
| APC anti-CD3e              | 145-2C11 (BioLegend) |
| APC-Cy7 anti-CD11b         | M1/70 (BioLegend)    |
| PE anti-NK1.1              | PK136 (BioLegend)    |
| PE-Cy7 anti-CD19           | 6D5 (BioLegend)      |

**A**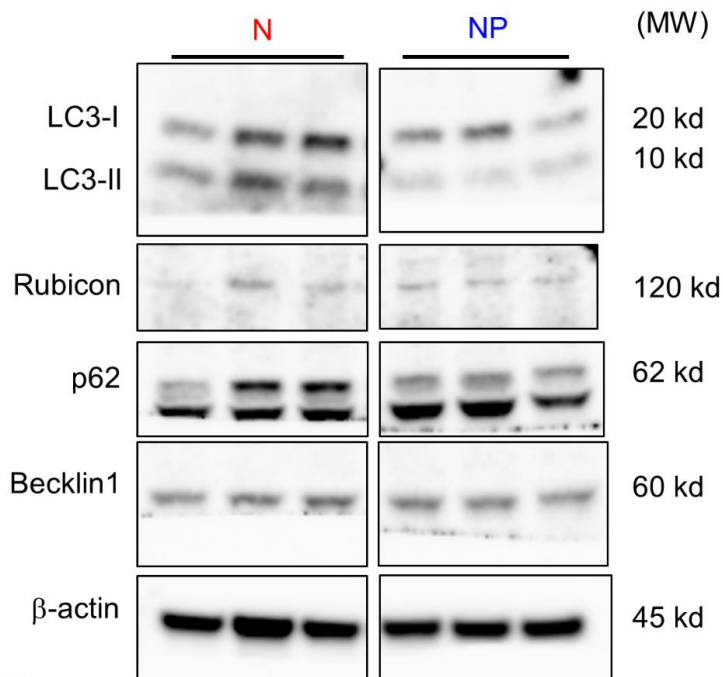**B**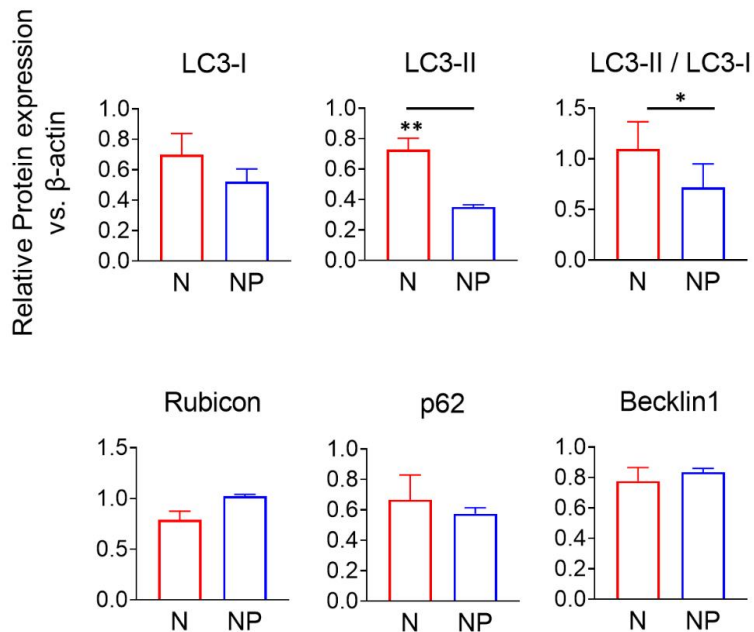

**Supplemental Figure 1. Autophagy function of the liver.** (A) and (B) Liver western blots for LC3-I, LC3-II, Rubicon, p62, Becklin1, and  $\beta$ -actin. Full-length blots are presented in Supplementary Figure X. Images were scanned and quantified by ImageJ software. The results are presented as the mean  $\pm$  SD, and p values were calculated using Student's t test. \*\* p<0.01, N vs. NP group. MW, molecular weight

Upper; LC3-I  
Lower; LC3-II

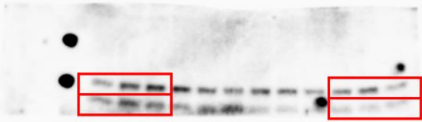

Rubicon

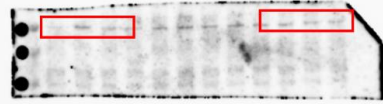

Upper; p62  
Lower; Becklin1

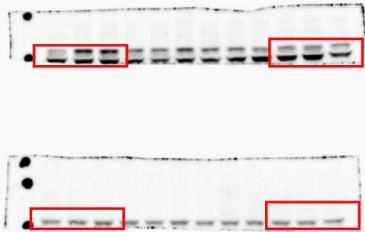

$\beta$ -actin

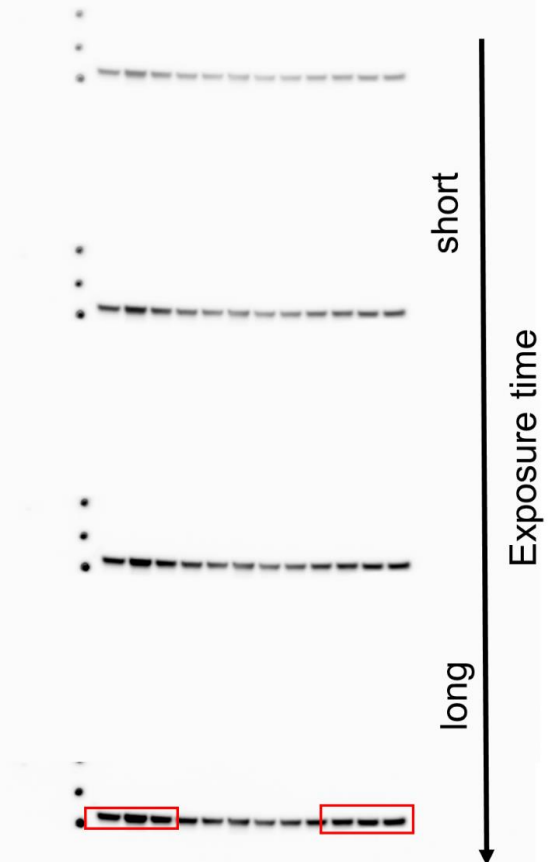

**Supplemental Figure 2. Full-length blots/gels of proteins of the liver presented in Supplemental Figure 1.**

Lxra

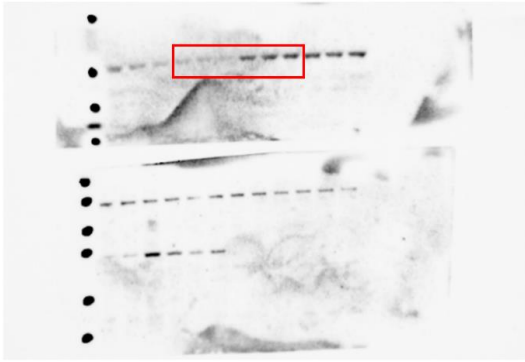

Abca1

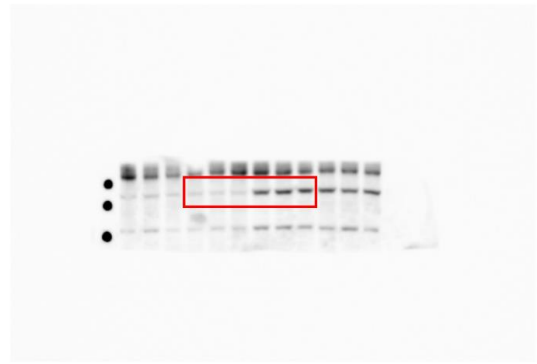

MTTP

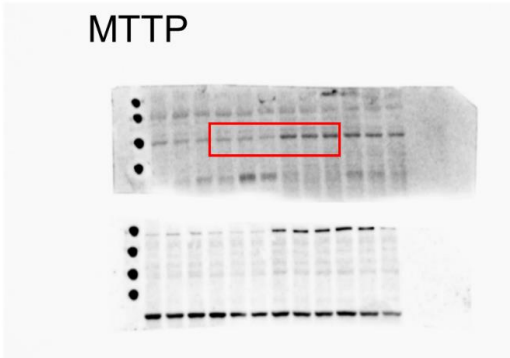

CD36

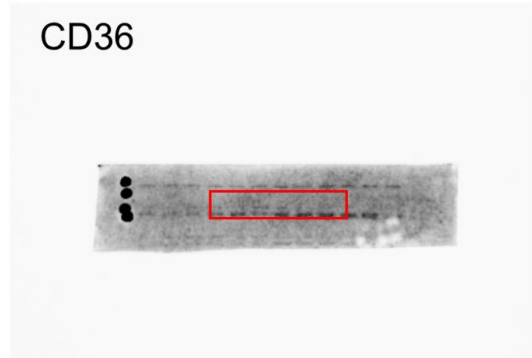

Caspase1

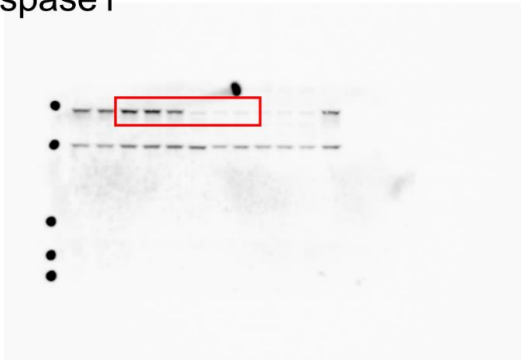

Gapdh(①-④)

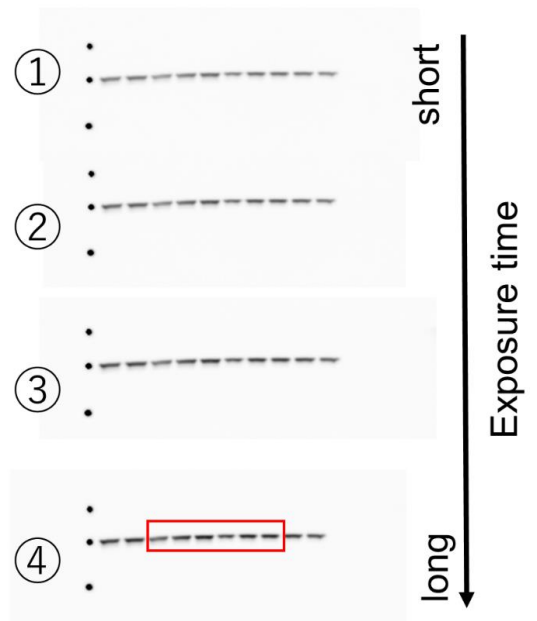

Supplemental Figure 3. Full-length blots/gels of proteins of the liver presented in Figure 2E.

Caspase-1

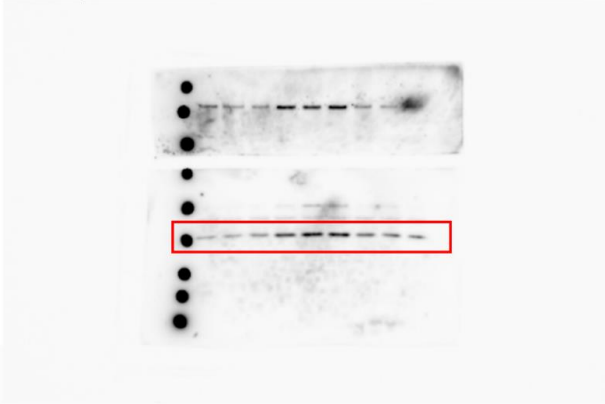

Asc

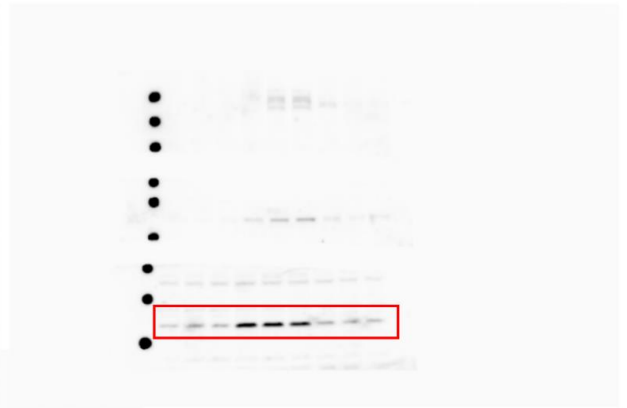

Akt

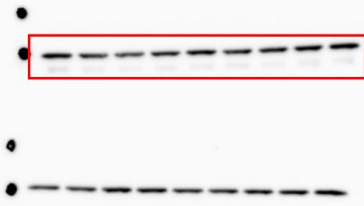

Upper; p-mTOR  
Lower; p-Akt

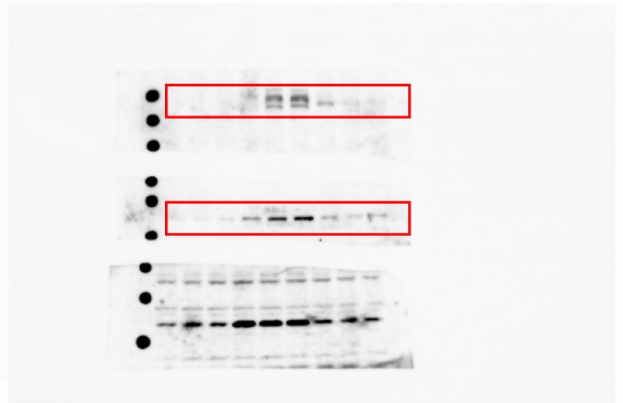

mTOR (①-④)

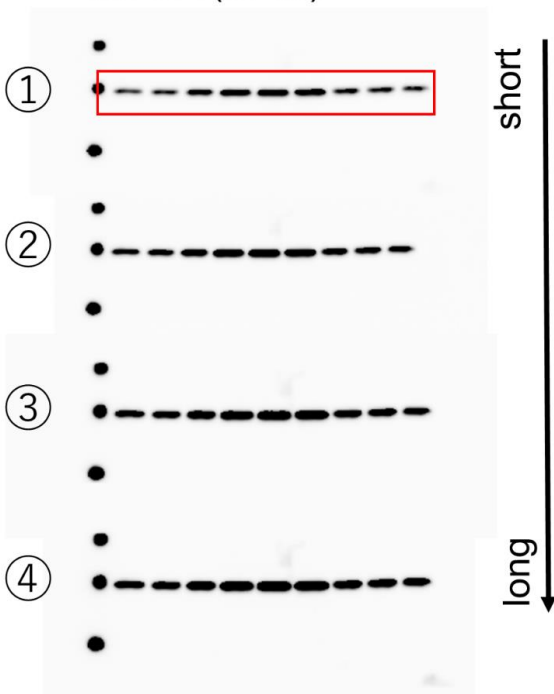

Gapdh

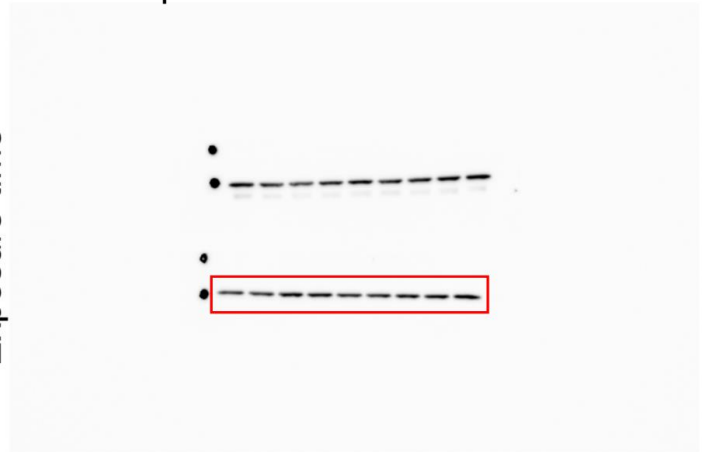

Supplemental Figure 4. Full-length blots/gels of proteins of the heart presented in Figure 5B.

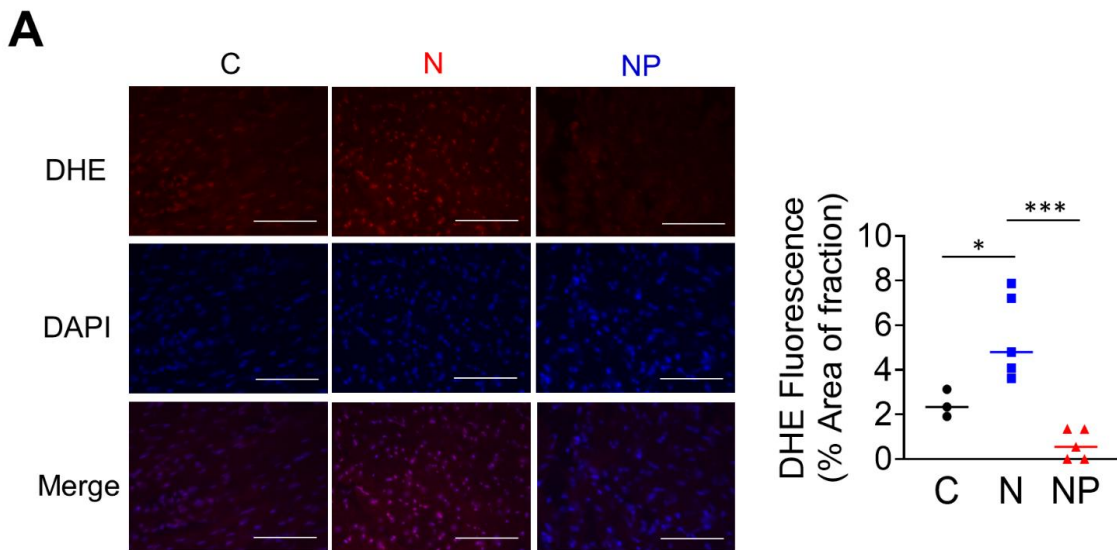

**Supplemental Figure 5. ROS production in myocardium.** (A) Reactive oxygen species in the myocardium were measured by fluorescence using dihydroethidium. The results are presented as the mean  $\pm$  SD, and p values were calculated using one-way ANOVA with Tukey's post hoc test. \*  $p < 0.05$  and \*\*\*  $p < 0.001$ , C vs. N group or N vs. NP group. The number of mice in each group: C,  $n = 3$ ; N,  $n = 5$ ; NP,  $n = 5$ . ROS, reactive oxygen species; DHE, dihydroethidium; DAPI, 4,6-diamidino-2-phenylindole

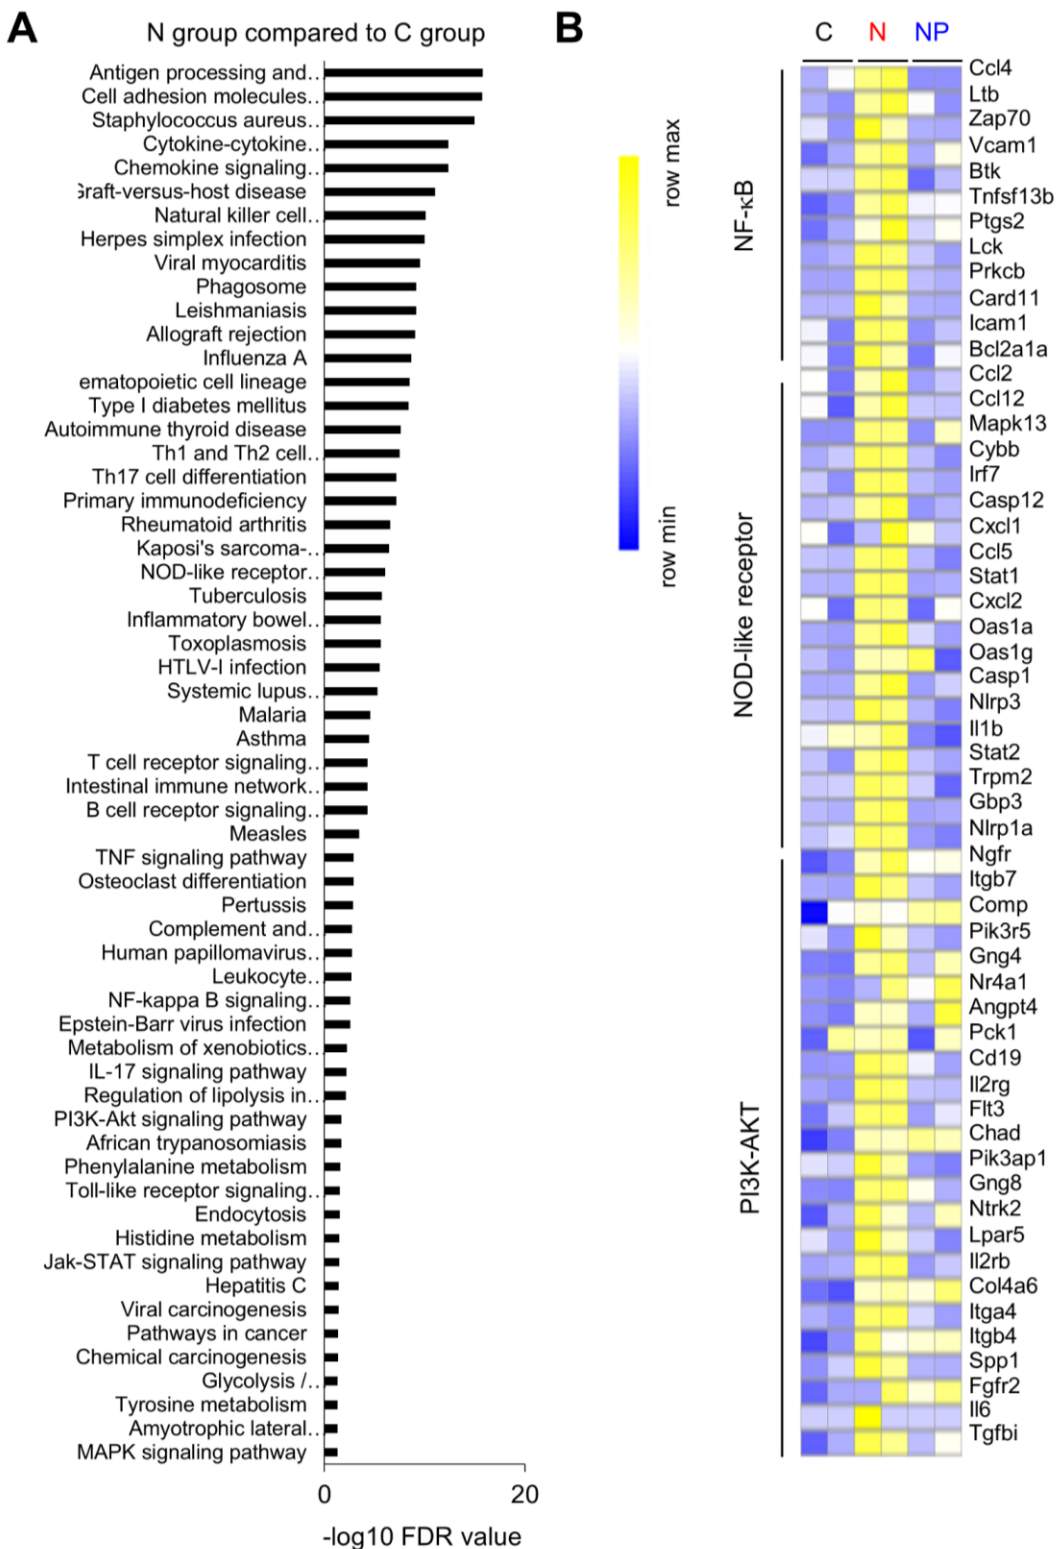

**Supplemental Figure 6. Pathway analysis and heatmap analysis of the heart created based on RNA sequencing.** (A) Pathways upregulated in the N group compared to the C group. (B) Heatmap imaging of genes related to the NF- $\kappa$ B, NOD-like receptor, and PI3K-Akt signalling pathways. The number of mice in each group: C, n=2; N, n=2; NP, n=2. FDR, false discovery rate. Statistical analyses were carried out using FDR correction. A default FDR<0.05 was considered statistically significant.
